# Supplementary material
Source: PubMed Central journal article supplement (PMC1899912)
Supplement: molcellb_27_7_2758__1.pdf [file molcellb_27_7_2758__1.pdf]

Table 1, supplement. Significance analysis of microarray results with a false discovery rate of less than 48%

| Affymetrix ID | FDR <sup>1</sup> | ratio ko/cont | Cont 1 | Cont 3 | Cont 5 | Cont 7 | Cont 9 | KO 2   | KO 4   | KO 6   | KO 8   | KO 10  | Common        | Synonyms                   | Genbank   |
|---------------|------------------|---------------|--------|--------|--------|--------|--------|--------|--------|--------|--------|--------|---------------|----------------------------|-----------|
|               |                  |               | Raw    |               |                            |           |
| 1415822_at    | 43.92            | 4.548613448   | 28.325 | 18.854 | 28.977 | 33.087 | 39.923 | 118.72 | 286.62 | 80.148 | 141.84 | 51.169 | Scd2          |                            | BG060909  |
| 1415904_at    | 0                | 3.799080897   | 226.06 | 327.51 | 256.4  | 173.85 | 417.44 | 1109.9 | 1047.3 | 972.65 | 1256.2 | 937.4  | Lpl           |                            | BC003305  |
| 1456388_at    | 0                | 3.600682785   | 21.297 | 23.246 | 20.725 | 21.594 | 14.521 | 45.793 | 68.261 | 96.446 | 59.96  | 94.593 | Atp11a        |                            | AV378604  |
| 1438617_at    | 0                | 3.296186491   | 179.18 | 179.13 | 190.21 | 169.55 | 238.24 | 955.01 | 631.21 | 435.84 | 625.01 | 505.07 | Serpina7      | Thyroxine Binding Globulin | BB222737  |
| 1431056_a_at  | 0                | 3.245518459   | 49.946 | 64.161 | 50.176 | 34.157 | 64.872 | 184.63 | 165.2  | 182.76 | 171.89 | 150.1  | Lpl           |                            | AK017272  |
| 1418213_at    | 44.19            | 2.053728054   | 11.667 | 12.157 | 10.465 | 15.139 | 21.797 | 22.13  | 33.302 | 30.893 | 39.591 | 20.359 | Krt1-23       |                            | NM_033373 |
| 1453556_x_at  | 44.19            | 1.705549858   | 22.226 | 30.44  | 33.175 | 33.026 | 36.445 | 61.157 | 35.43  | 61.491 | 55.998 | 50.815 | 2410026K10Rik | CD99                       | AK002762  |
| 1435600_s_at  | 10.31            | 1.610577115   | 26.153 | 24.484 | 23.282 | 27.224 | 24.129 | 40.637 | 34.344 | 50.376 | 42.123 | 34.28  | BC020535      |                            | AV174401  |
| 1437202_at    | 43.92            | 1.565880171   | 17.741 | 13.864 | 12.7   | 15.462 | 9.3109 | 23.012 | 22.103 | 21.94  | 21.103 | 20.011 | C530050H10Rik |                            | BB494594  |
| 1443322_at    | 43.92            | 1.527271691   | 10.787 | 11.818 | 11.165 | 12.01  | 12.983 | 16.001 | 17.848 | 13.784 | 23.539 | 18.575 |               |                            | AV328597  |
| 1451418_a_at  | 43.92            | 1.494237464   | 89.185 | 122.6  | 104.25 | 121.14 | 79.671 | 142.62 | 161.63 | 147.12 | 144.08 | 176.86 | Ssb4          |                            | BC023083  |
| 1446254_at    | 47.31            | 1.488514197   | 13.034 | 14.296 | 13.539 | 14.756 | 11.477 | 17.807 | 26.272 | 19.847 | 15.37  | 20.583 |               |                            | BB116559  |
| 1447558_at    | 44.19            | 1.461688827   | 6.3058 | 6.3706 | 6.3316 | 6.0682 | 6.1846 | 11.688 | 10.151 | 6.9794 | 8.4356 | 8.4404 |               |                            | BB138877  |
| 1437111_at    | 44.19            | 1.458389559   | 6.8397 | 6.6864 | 10.05  | 8.0283 | 6.6864 | 9.804  | 9.6439 | 12.327 | 11.55  | 12.519 | C230027N18Rik |                            | BB183628  |
| 1428736_at    | 43.92            | 1.393961429   | 100.76 | 96.873 | 135.07 | 120.43 | 109.27 | 182.72 | 163.04 | 136.19 | 142.99 | 159.03 | 9130427A09Rik |                            | AV259880  |
| 1435452_at    | 27.76            | 1.392051504   | 75.495 | 65.262 | 65.385 | 75.787 | 86.253 | 110.84 | 98.437 | 97.795 | 112.82 | 92.639 | Tmem20        |                            | BM121082  |
| 1451419_at    | 43.92            | 1.385958875   | 35.677 | 46.511 | 44.655 | 44.307 | 35.336 | 51.718 | 55.833 | 68.285 | 52.528 | 57.818 | Ssb4          |                            | BC023083  |
| 1416193_at    | 44.19            | 1.38327595    | 29.287 | 29.363 | 29.44  | 28.949 | 29.127 | 44.462 | 34.546 | 45.602 | 45.615 | 31.963 | Car1          |                            | BC011223  |
| 1430514_a_at  | 43.92            | 1.378448312   | 15.577 | 15.577 | 15.802 | 17.107 | 16.337 | 18.847 | 24.876 | 21.842 | 26.614 | 18.648 | 2410026K10Rik |                            | AK002762  |
| 1449001_at    | 0                | 1.377269824   | 187.01 | 198.94 | 201.68 | 207.91 | 197.01 | 267.09 | 301.44 | 256.91 | 297.97 | 243.61 | Ivd           |                            | AV221988  |
| 1435554_at    | 39.01            | 1.356051615   | 108.94 | 138.39 | 155.19 | 140.65 | 124.38 | 173.75 | 169.3  | 191.63 | 188.62 | 181.91 | C630016B22Rik |                            | BB771888  |
| 1434659_at    | 44.19            | 1.341403349   | 42.63  | 53.45  | 54.066 | 49.559 | 47.321 | 57.319 | 63.883 | 59.686 | 74.545 | 75.928 | 5830411G16Rik |                            | BB514213  |
| 1452384_at    | 34.37            | 1.338312093   | 18.124 | 18.514 | 20.942 | 18.035 | 18.374 | 26.835 | 28.482 | 23.686 | 21.251 | 25.535 | Enpp3         |                            | AV224446  |
| 1416918_at    | 0                | 1.337909023   | 28.362 | 28.467 | 28.981 | 28.571 | 28.467 | 34.465 | 39.055 | 37.924 | 38.179 | 41.494 | Dlgh3         |                            | NM_016747 |
| 1450724_at    | 43.92            | 1.326301717   | 111.83 | 121.31 | 92.908 | 125.62 | 122.63 | 137.66 | 168.6  | 146.41 | 164.27 | 144.77 | Drctnrb1a     |                            | NM_053090 |
| 1434405_at    | 44.19            | 1.314539318   | 29.086 | 26.004 | 28.52  | 25.587 | 22.294 | 30.859 | 36.092 | 34.677 | 40.123 | 31.099 | A730024A03Rik |                            | BB360713  |
| 1452262_at    | 43.92            | 1.313613408   | 81.239 | 74.669 | 93.91  | 91.403 | 82.077 | 100.71 | 113.94 | 98.073 | 114.1  | 129.24 | Grpel2        |                            | AK003011  |
| 1448506_at    | 43.92            | 1.309410019   | 4494.7 | 4909.9 | 4188.3 | 4375.1 | 4176.2 | 5403.3 | 5426.5 | 5642.5 | 7178.2 | 5345.4 | Serpina6      |                            | NM_007618 |
| 1429559_at    | 0                | 1.308049925   | 14.695 | 14.266 | 15.441 | 16.325 | 16.723 | 18.827 | 20.973 | 19.963 | 20.994 | 20.551 | Gnaq          |                            | AK003474  |
| 1425603_at    | 27.76            | 1.305752838   | 402.4  | 416.83 | 423.42 | 410.45 | 397.61 | 528.95 | 476.43 | 617.73 | 486.92 | 567.68 | 0610011I04Rik |                            | BC006049  |
| 1454658_at    | 44.19            | 1.303581226   | 88.204 | 78.67  | 97.316 | 86.667 | 95.237 | 99.961 | 113.28 | 122.08 | 137.58 | 108.63 | Ilvbl         |                            | BI408416  |
| 1426812_a_at  | 43.16            | 1.298913559   | 43.424 | 42.492 | 39.763 | 36.182 | 43.387 | 49.721 | 46.4   | 59.471 | 55.811 | 55.199 | 9130404D14Rik |                            | BF166604  |
| 1429810_at    | 44.19            | 1.295862176   | 8.4724 | 8.7166 | 8.8958 | 8.4545 | 8.4323 | 12.252 | 13.22  | 10.248 | 10.437 | 9.5284 | 4921505C17Rik |                            | BM123174  |
| 1455165_at    | 43.16            | 1.29414145    | 146.32 | 105.35 | 124.06 | 131.25 | 126.3  | 159.22 | 163.29 | 158.08 | 162.12 | 176.84 |               |                            | BE335227  |
| 1428695_at    | 27.76            | 1.287996163   | 30.237 | 26.903 | 29.061 | 24.058 | 29.846 | 35.263 | 36.461 | 39.431 | 34.052 | 35.245 | 9130227C08Rik |                            | BB424872  |
| 1426733_at    | 44.19            | 1.285938685   | 55.923 | 74.546 | 74.409 | 61.889 | 62.101 | 87.558 | 84.875 | 79.078 | 91.226 | 80.167 | Itpk1         |                            | AW552407  |
| 1433568_at    | 43.92            | 1.269346717   | 55.534 | 54.214 | 65.099 | 65.5   | 53.503 | 69.347 | 76.59  | 81.433 | 76.428 | 69.201 | Papd4         |                            | AV301313  |
| 1424979_at    | 43.92            | 1.268889098   | 83.056 | 82.433 | 80.658 | 77.057 | 74.355 | 99.537 | 116.02 | 106.14 | 86.941 | 95.813 | 6530402N02Rik |                            | BC012406  |
| 1460642_at    | 24.26            | 1.263213344   | 12.104 | 11.605 | 11.801 | 11.863 | 13.146 | 13.372 | 15.618 | 16.1   | 15.2   | 16.158 | Traf4         |                            | NM_009423 |
| 1422666_at    | 43.92            | 1.249206265   | 39.217 | 47.636 | 44.44  | 45.426 | 46.15  | 48.95  | 55.855 | 54.174 | 58.829 | 60.601 | Cblc          |                            | NM_023224 |
| 1428598_at    | 47.31            | 1.234110678   | 43.911 | 42.019 | 39.018 | 47.415 | 49.76  | 49.743 | 52.027 | 59.416 | 55.894 | 57.044 | Tbc1d7        |                            | AK011356  |
| 1434891_at    | 43.92            | 1.217531495   | 8.5651 | 7.9175 | 7.3627 | 8.4798 | 8.2377 | 10.317 | 9.1264 | 8.9028 | 10.471 | 10.569 | 4833445A08Rik |                            | AV253087  |
| 1449028_at    | 27.76            | 1.206185576   | 346.5  | 338.37 | 344.05 | 370.15 | 353.97 | 416.39 | 457.04 | 390.63 | 451.66 | 398.76 | Rhou          |                            | AF378088  |
| 1452820_at    | 27.76            | 1.193115172   | 69.236 | 72.758 | 75.78  | 70.929 | 80.231 | 91.62  | 84.912 | 93.401 | 84.888 | 85.361 | Wdr11         |                            | AK013701  |
| 1452798_s_at  | 44.19            | 1.190931216   | 57.76  | 51.748 | 53.604 | 56.66  | 55.688 | 59.856 | 65.677 | 61.55  | 73.629 | 67.341 | 2310009E07Rik |                            | AK009250  |
| 1450675_at    | 44.19            | 1.180422532   | 84.789 | 75.9   | 84.34  | 87.152 | 94.949 | 100.06 | 105.56 | 105.68 | 98.208 | 94.686 | 1810031K02Rik |                            | NM_133716 |
| 1434337_at    | 44.19            | 1.176248186   | 136.53 | 112.74 | 121.26 | 120.28 | 130.38 | 147.8  | 152.04 | 136.3  | 152.38 | 142.15 | Cklfsf3       |                            | BE136285  |
| 1433645_at    | 43.16            | 1.176213016   | 350.21 | 375.35 | 342.37 | 350.26 | 372.53 | 411.45 | 454.22 | 443.35 | 413.63 | 383.61 | 2210409B22Rik |                            | BM207133  |
| 1455639_at    | 39.01            | 1.157728573   | 48.748 | 51.466 | 49.295 | 50.008 | 46.208 | 57.014 | 53.649 | 60.436 | 59.192 | 54.193 | Rap2ip        |                            | AV224593  |
| 1429046_at    | 43.16            | 1.152507879   | 69.102 | 72.542 | 67.768 | 67.867 | 78.713 | 80.095 | 83.031 | 85.194 | 80.504 | 81.46  | 2810411E22Rik |                            | BI697997  |
| 1424108_at    | 43.92            | 1.147434038   | 2296.5 | 2277.9 | 2497   | 2435.7 | 2587.6 | 2922.3 | 2659.8 | 2866.6 | 2699.9 | 2729.1 | Glo1          |                            | BC024663  |
| 1454905_at    | 44.19            | 1.125122069   | 93.308 | 92.965 | 94.82  | 92.916 | 89.623 | 98.217 | 99.388 | 106.15 | 104.28 | 113.61 | 5430411K16Rik |                            | BM205711  |
| 1418148_at    | 43.92            | 1.123661001   | 368.16 | 385.11 | 374.92 | 413.46 | 391.72 | 427.77 | 427.34 | 463.81 | 427.09 | 426.45 | Abhd1         |                            | NM_021304 |
| 1424109_a_at  | 44.19            | 1.119312282   | 6393.3 | 6334.8 | 6414.1 | 6683.4 | 6406.8 | 7367.4 | 7461.3 | 7524.1 | 7169.6 | 6555.9 | Glo1          |                            | BC024663  |
| 1424541_at    | 44.19            | 1.106342726   | 198.29 | 221.14 | 199.6  | 209.75 | 220.45 | 227.02 | 228.71 | 233.99 | 237.88 | 233.21 | 1110020A09Rik |                            | BC011320  |
| 1415785_a_at  | 44.19            | 1.095531534   | 826.35 | 841.48 | 824.3  | 832.23 | 725.77 | 906.74 | 862.65 | 913.05 | 894.51 | 892.88 | Cct8          |                            | NM_009840 |
| 1448596_at    | 10.31            | 1.07119247    | 8.433  | 8.3792 | 8.4297 | 8.534  | 8.3531 | 9.2905 | 8.8576 | 8.9675 | 8.8693 | 9.1432 | Slc6a8        |                            | BG069516  |
| 1416881_at    | 27.76            | 1.070137325   | 118.3  | 116.03 | 120.54 | 122.17 | 118.7  | 125.83 | 125.4  | 130.64 | 129.2  | 126.46 | Mcl1          |                            | BC003839  |

|              |       |             |        |        |        |        |        |        |        |        |        |        |                      |           |
|--------------|-------|-------------|--------|--------|--------|--------|--------|--------|--------|--------|--------|--------|----------------------|-----------|
| 1436972_at   | 47.37 | 0.948797762 | 8.5384 | 8.692  | 8.8211 | 8.9738 | 8.9122 | 8.472  | 8.4891 | 8.2852 | 8.1288 | 8.3128 | Gpr61                | AV291075  |
| 1417242_at   | 33.26 | 0.914267261 | 303.91 | 305.15 | 320.73 | 324.61 | 308.1  | 293.3  | 289.8  | 282.57 | 283.05 | 279.84 | Ddx48                | NM_138669 |
| 1456887_at   | 43.92 | 0.906931691 | 8.5033 | 9.1525 | 9.1244 | 9.5481 | 9.1831 | 8.1003 | 8.171  | 8.3523 | 8.4809 | 8.171  | 1700030P01Rik        | AW228687  |
| 1450744_at   | 47.37 | 0.901931463 | 937.65 | 986.22 | 941.71 | 981.79 | 898.36 | 841.41 | 874.24 | 810.59 | 905.13 | 848.94 | Eil2                 | NM_138953 |
| 1419622_at   | 47.37 | 0.893433585 | 6982.6 | 6688.9 | 7769.4 | 7244.9 | 7361.1 | 6263.5 | 6525.7 | 6596.4 | 6312.7 | 6507.1 | 9430041C03Rik        | NM_009467 |
| 1456607_at   | 43.16 | 0.892927992 | 96.127 | 102.25 | 98.571 | 106.53 | 98.398 | 90.362 | 94.015 | 86.61  | 86.796 | 90.35  | 5730538E15Rik        | AV320529  |
| 1437761_at   | 47.31 | 0.892639346 | 293.49 | 266.33 | 286.36 | 265.22 | 281.64 | 258.36 | 241.11 | 247.31 | 239.95 | 256.75 | Luc7l2               | BI693511  |
| 1426773_at   | 47.37 | 0.883242868 | 135.43 | 144.76 | 139.19 | 135.12 | 133.62 | 122.42 | 116.23 | 113.35 | 131.8  | 123.97 | Mfn1                 | AK018181  |
| 1451625_a_at | 47.37 | 0.876266038 | 6924.1 | 6449.6 | 7308.3 | 7418.8 | 7146.3 | 6081.8 | 5872.9 | 6004.3 | 6581.8 | 6344.9 | 1700013L23Rik        | BC019967  |
| 1457362_at   | 33.26 | 0.87614482  | 6.9999 | 7.5855 | 7.3224 | 7.3701 | 7.8356 | 6.4048 | 6.7152 | 6.1395 | 6.5421 | 6.7152 |                      | BE852749  |
| 1449465_at   | 33.26 | 0.871740296 | 457.8  | 474.03 | 431.13 | 460.38 | 451.81 | 376.69 | 382.14 | 414.8  | 417.85 | 391.86 | Reln                 | NM_011261 |
| 1423884_at   | 43.16 | 0.871077769 | 177.15 | 172.48 | 179.11 | 165.33 | 159.14 | 140.22 | 145.72 | 154.58 | 155.36 | 147.33 | Tex292               | BC027399  |
| 1436346_at   | 47.37 | 0.869087766 | 7.386  | 6.8805 | 7.1928 | 7.3837 | 7.7695 | 6.35   | 5.7905 | 6.3981 | 6.4003 | 6.8805 | Cd109                | AV246882  |
| 1436767_at   | 39.01 | 0.868874922 | 334.6  | 333.7  | 313.04 | 335.77 | 299.46 | 297.39 | 272.18 | 282.66 | 280.38 | 271.98 | Luc7l2               | BB475271  |
| 1417962_s_at | 47.37 | 0.866580665 | 3011.4 | 3290   | 3304.9 | 3414.2 | 3189.2 | 2637.5 | 2688.8 | 3085.6 | 2862   | 2773.1 | Ghr                  | NM_010284 |
| 1419611_at   | 47.31 | 0.862041936 | 28.096 | 25.7   | 25.829 | 28.951 | 29.13  | 23.998 | 23.605 | 24.328 | 21.949 | 24.829 | 4632415L05Rik        | BC023403  |
| 1425506_at   | 40.7  | 0.86090437  | 250.01 | 265.93 | 243.19 | 272.4  | 242.48 | 210.22 | 217.63 | 220.84 | 235.37 | 212.73 | 9530072E15Rik        | BF451748  |
| 1441592_at   | 47.37 | 0.853170954 | 34.849 | 34.082 | 34.248 | 36.662 | 30.578 | 31.721 | 27.664 | 28.452 | 29.691 | 27.869 |                      | BB667902  |
| 1436881_x_at | 39.01 | 0.839803946 | 9.5121 | 9.2522 | 8.3154 | 8.4534 | 8.2793 | 7.103  | 7.6015 | 7.5446 | 6.9093 | 7.6356 | Afp                  | BB273712  |
| 1460228_at   | 19.33 | 0.835195563 | 80.29  | 84.797 | 92.855 | 82.803 | 87.389 | 75.309 | 70.143 | 71.873 | 71.22  | 69.031 | Usf2                 | AW537576  |
| 1419677_at   | 47.37 | 0.831475861 | 1496.6 | 1398.2 | 1441.7 | 1409.1 | 1373.3 | 1069.6 | 1177.7 | 1273.2 | 1077.5 | 1321.2 | Masp1                | NM_008555 |
| 1437197_at   | 47.31 | 0.831396027 | 341.76 | 352.33 | 421.59 | 358.43 | 353.78 | 297.67 | 303.84 | 314.99 | 317.29 | 285.9  | 9430041O17Rik        | BB251748  |
| 1435800_a_at | 47.37 | 0.825730996 | 484.46 | 502    | 457.9  | 506.99 | 513.27 | 369.4  | 467.4  | 388.56 | 423.69 | 386.05 | Csda                 | BB779100  |
| 1421456_at   | 47.31 | 0.825475348 | 7.5084 | 8.922  | 7.1004 | 6.9854 | 7.8699 | 6.3351 | 6.3518 | 6.1954 | 6.3988 | 6.4057 | P2ry1                | NM_008772 |
| 1423316_at   | 47.31 | 0.821687026 | 99.44  | 103.14 | 83.456 | 96.211 | 102.25 | 84.074 | 80.216 | 82.119 | 75.84  | 75.853 | 2610033C09Rik        | AK017817  |
| 1418388_s_at | 27.76 | 0.820112077 | 172.58 | 189.03 | 158.96 | 169.46 | 170.14 | 141.38 | 141.49 | 147.26 | 145.57 | 129.73 | 4930548G07Rik        | NM_023773 |
| 1416795_at   | 47.37 | 0.807238532 | 68.75  | 73.773 | 80.775 | 75.058 | 69.332 | 55.825 | 51.9   | 59.031 | 63.049 | 67.007 | Cryl1                | NM_030004 |
| 1428496_at   | 47.37 | 0.805210678 | 128.9  | 145.69 | 134.95 | 125.63 | 144.72 | 109.53 | 115.59 | 97.974 | 125.18 | 99.188 | Secisbp2             | AA198634  |
| 1436766_at   | 47.31 | 0.800579656 | 2101.6 | 2129.7 | 1874.3 | 1950.4 | 1627.4 | 1572.9 | 1572.9 | 1449.6 | 1549.9 | 1606.9 | Luc7l2               | BB475271  |
| 1423512_at   | 47.37 | 0.799926876 | 192.56 | 234.01 | 185.4  | 218.06 | 181.91 | 170.36 | 159.9  | 152.61 | 169.78 | 156.82 | AW209491             | BF715189  |
| 1455208_at   | 47.37 | 0.795539709 | 24.655 | 24.895 | 23.956 | 20.069 | 19.404 | 17.433 | 18.778 | 17.211 | 17.993 | 18.464 | Pex19                | AV229364  |
| 1437894_at   | 47.31 | 0.790238376 | 92.912 | 96.875 | 79.315 | 91.061 | 91.503 | 59.773 | 71.926 | 76.11  | 77.187 | 71.926 | A230003G05Rik        | BE994433  |
| 1434330_at   | 47.37 | 0.786830353 | 282    | 314.06 | 312.58 | 312.41 | 265.52 | 217.89 | 259.99 | 251.18 | 242.96 | 197.65 | E130107N23Rik        | BB540721  |
| 1436885_a_at | 33.26 | 0.780797798 | 161.25 | 174.91 | 171.42 | 176.63 | 152.51 | 119.17 | 141.6  | 145.03 | 122.45 | 125.05 | Cherp                | BB700223  |
| 1427411_s_at | 47.37 | 0.774294091 | 76.714 | 86.64  | 79.942 | 83.456 | 63.182 | 63.182 | 64.437 | 54.633 | 57.345 | 62.328 | Dleu2                | BB812902  |
| 1450873_at   | 0     | 0.773051459 | 337.25 | 381.12 | 350.31 | 356.39 | 338.66 | 280.41 | 266.34 | 264.76 | 282.42 | 269.54 | Gtpbp4               | AI987834  |
| 1431566_at   | 47.37 | 0.767715432 | 83.684 | 87.018 | 78.768 | 96.643 | 83.021 | 54.16  | 62.974 | 68.182 | 68.527 | 75.611 | 9030622O22Rik        | AW319512  |
| 1423859_a_at | 47.31 | 0.765558154 | 122.14 | 108.39 | 123.02 | 146.01 | 142.84 | 97.316 | 104.06 | 92.365 | 95.297 | 102.76 | Ptgds                | AB006361  |
| 1459488_at   | 47.37 | 0.763264557 | 76.249 | 70.283 | 72.191 | 72.232 | 71.718 | 52.62  | 59.381 | 57.739 | 64.212 | 42.863 |                      | BM249225  |
| 1449861_at   | 33.26 | 0.75859729  | 25.963 | 31.033 | 30.45  | 27.56  | 33.893 | 20.609 | 22.631 | 22.402 | 24.566 | 22.745 | Nek4                 | BF181187  |
| 1455643_s_at | 47.37 | 0.754814703 | 143.33 | 191.55 | 139.24 | 171.34 | 161.48 | 124.62 | 132.43 | 109.4  | 116.92 | 125.73 | AW550801             | BF228294  |
| 1434481_at   | 47.37 | 0.740760414 | 70.516 | 67.943 | 69.174 | 71.866 | 81.405 | 63.812 | 47.338 | 44.378 | 51.861 | 59.956 | 4121402D02Rik        | BI695596  |
| 1450531_at   | 47.37 | 0.738449374 | 279.81 | 211.67 | 209.07 | 242.24 | 193.21 | 169.91 | 189.79 | 155.63 | 163.81 | 159.76 | H2-Q10               | NM_008199 |
| 1449870_a_at | 22.91 | 0.726352826 | 28.611 | 30.965 | 33.744 | 27.904 | 29.293 | 18.693 | 21.354 | 24.411 | 21.968 | 22.904 | Atp6v0a2             | NM_011596 |
| 1426269_at   | 14.73 | 0.716890486 | 415.98 | 476.66 | 480.11 | 454.89 | 400.33 | 302.4  | 306.66 | 363.66 | 297.86 | 326.63 | Sybl1                | BC003764  |
| 1422072_a_at | 47.31 | 0.716588851 | 371.03 | 304.45 | 469.33 | 370.64 | 368.63 | 277.44 | 280.4  | 284.3  | 259.19 | 248.78 | Gstm6                | NM_008184 |
| 1419393_at   | 19.33 | 0.713933742 | 464.48 | 371.16 | 447.91 | 492.96 | 474.09 | 305.99 | 338.68 | 340.44 | 321.8  | 299.87 | Abcg5                | NM_031884 |
| 1452007_at   | 14.73 | 0.689537269 | 210.55 | 228.33 | 234.01 | 206.68 | 184.82 | 135.37 | 146.16 | 165.02 | 136.38 | 151.01 | Sybl1                | BC003764  |
| 1442351_a_at | 33.26 | 0.671640367 | 84.976 | 103.82 | 111.05 | 113.19 | 107.35 | 72.319 | 60.708 | 84.474 | 67.967 | 64.042 | BC029214             | BB313029  |
| 1424572_a_at | 27.76 | 0.633424787 | 211.99 | 168.38 | 188.76 | 163.57 | 182.06 | 102.76 | 136.63 | 125.64 | 92.505 | 121.89 | H2afy                | AF171080  |
| 1424133_at   | 14.73 | 0.612390716 | 165.49 | 133.93 | 153.35 | 152.98 | 185.24 | 91.69  | 94.237 | 103.36 | 111.01 | 84.102 | 6530411B15Rik        | BC011208  |
| 1418804_at   | 14.73 | 0.546817481 | 216.74 | 231.39 | 215.33 | 255.09 | 205.8  | 122.19 | 149.96 | 142.44 | 108.56 | 91.652 | Gpr91                | NM_032400 |
| 1437064_at   | 43.92 | 0.520524782 | 15.408 | 14.551 | 17.361 | 8.377  | 11.733 | 6.4741 | 7.6799 | 8.2066 | 6.4877 | 6.2504 | AW320017             | AV232123  |
|              |       |             |        |        |        |        |        |        |        |        |        |        | Androgen receptor    |           |
|              |       |             |        |        |        |        |        |        |        |        |        |        | MacroH2A1            |           |
|              |       |             |        |        |        |        |        |        |        |        |        |        | Succinate receptor 1 |           |

<sup>1</sup>False discovery rate, this is a statistical estimate of the percentage of genes identified by chance, see Tusher, V. G., Tibshirani, R. and Chu, G. 2001. Proc Natl Acad Sci U S A 98, 5116-5121.
