# Supplementary material
Source: PubMed Central journal article supplement (PMC1899912)
Supplement: molcellb_27_7_2758__2.pdf [file molcellb_27_7_2758__2.pdf]

Table 2, supplement. Distribution of macroH2A1 on genes with altered expression in *macroH2A1* knockout liver

| Gene            | Location (bp) |          | Relative concentration <sup>1</sup> |            |              |
|-----------------|---------------|----------|-------------------------------------|------------|--------------|
|                 | From start    | From end | Newborn <sup>2</sup>                | Adult Male | Adult Female |
| <i>Lpl</i>      | -13,626       |          | 0.7 ± 0.01                          | 8.1 ± 0.52 | 7 ± 0.46     |
|                 | -11,280       |          | 0.6 ± 0.04                          | 5 ± 0.02   | 5.4 ± 0.17   |
|                 | -6,826        |          | 0.3 ± 0.02                          | 5.2 ± 0.02 | 5.1 ± 0.3    |
|                 | -4,147        |          | 1 ± 0.01                            | 4.6 ± 0.0  | 4.8 ± 0.55   |
|                 | -1,260        |          | 0.5 ± 0.01                          | 3.8 ± 0.14 | 3.7 ± 0.38   |
|                 | -450          |          | 0.3 ± 0.02                          | 1.5 ± 0.13 | 1.7 ± 0.05   |
|                 | -294          |          | 0.2 ± 0.01                          | 1 ± 0.01   | 1.2 ± 0.03   |
|                 | -188          |          | 0.2 ± 0.02                          | 0.7 ± 0.06 | 0.7 ± 0.05   |
|                 | +72           | -26,326  | 0.1 ± 0.02                          | 0.4 ± 0.07 | 0.4 ± 0.03   |
|                 | +3,225        | -23,173  | 0.4 ± 0.02                          | 1.3 ± 0.1  | 1.2 ± 0.18   |
|                 | +7,038        | -19,360  |                                     | 0.5 ± 0.07 | 0.5 ± 0.06   |
|                 | +13,129       | -13,269  |                                     | 0.8 ± 0.05 | 0.9 ± 0.06   |
|                 | +17,719       | -8,679   | 0.2 ± 0.02                          | 0.8 ± 0.03 | 0.8 ± 0.04   |
|                 | +23,905       | -2,493   |                                     | 0.8 ± 0.04 | 0.7 ± 0.03   |
|                 | +25,948       | -381     | 0.2 ± 0.01                          | 1.1 ± 0.01 | 1.1 ± 0.18   |
| <i>Krt1-23</i>  | -2,893        |          | 0.4 ± 0.04                          | 3.8 ± 0.08 | 3.1 ± 0.05   |
|                 | -1,857        |          | 0.6 ± 0.01                          | 5.7 ± 0.47 | 5 ± 0.49     |
|                 | -845          |          | 0.4 ± 0.03                          | 5.7 ± 0.46 | 6.3 ± 1.42   |
|                 | -496          |          | 0.2 ± 0.01                          | 4.5 ± 0.28 | 3.4 ± 0.18   |
|                 | -109          |          | 0.2 ± 0.03                          | 1.8 ± 0.11 | 1.2 ± 0.06   |
|                 | +63           |          |                                     | 2.9 ± 0.16 | 2.2 ± 0.17   |
|                 | +579          | -14,558  | 0.2 ± 0.09                          | 4.4 ± 0.38 | 3.6 ± 0.44   |
|                 | +2,011        | -13,126  |                                     | 1.4 ± 0.25 | 1.3 ± 0.18   |
|                 | +4,496        | -10,641  | 0.2 ± 0.04                          | 5.4 ± 0.07 | 5.4 ± 0.52   |
|                 | +9,468        | -5,669   | 0.1 ± 0.05                          | 5.8 ± 0.08 | 4.6 ± 0.04   |
|                 | +11,673       | -3,464   | 0.1 ± 0.03                          | 4.4 ± 0.3  | 3.9 ± 0.9    |
|                 | +14,853       | -284     | 0.2 ± 0.1                           | 5.5 ± 0.01 | 5.2 ± 0.81   |
| <i>Serpina7</i> | -4,505        |          | 0.8 ± 0.15                          | 3.3 ± 0.24 | 3.2 ± 0.5    |
|                 | -2,163        |          | 0.7 ± 0.11                          | 2.3 ± 0.22 | 3.5 ± 0.43   |
|                 | -1,739        |          | 0.5 ± 0.1                           | 1.1 ± 0.01 | 2.7 ± 0.18   |
|                 | -1,260        |          | 0.5 ± 0.1                           | 2.1 ± 0.11 | 2.8 ± 0.13   |
|                 | -948          |          | 0.6 ± 0.14                          | 3.8 ± 0.02 | 3.9 ± 0.42   |
|                 | -342          |          | 0.4 ± 0.01                          | 2.2 ± 0.34 | 2.1 ± 0.14   |
|                 | -136          |          | 0.4 ± 0.07                          | 2.9 ± 0.76 | 2.8 ± 0.28   |

|                 |          |          |            |            |            |
|-----------------|----------|----------|------------|------------|------------|
| <i>Serpina7</i> | +238     | -3,289   | 0.5 ± 0.11 | 2.2 ± 0.03 | 2.4 ± 0.21 |
|                 | +937     | -2,590   | 0.7 ± 0.14 | 3.3 ± 0.36 | 3 ± 0.64   |
|                 | +2,252   | -1,275   | 0.7 ± 0.03 | 2.9 ± 0.68 | 3.7 ± 0.39 |
|                 | +3,300   | -227     | 0.5 ± 0.15 | 2.5 ± 0.02 | 2.1 ± 0.71 |
| <i>Scd2</i>     | -6,284   |          | 2.0 ± 0.75 | 5.6 ± 0.34 | 5.7 ± 1.48 |
|                 | -4,653   |          | 1.3 ± 1.59 | 5.6 ± 0.11 | 4.7 ± 0.51 |
|                 | -2,145   |          | 1.8 ± 0.5  | 6.4 ± 0.21 | 5.6 ± 0.63 |
|                 | -1,285   |          | 1.1 ± 0.43 | 7 ± 0.31   | 6 ± 0.33   |
|                 | -370     |          | 0.4 ± 0.02 | 4.4 ± 0.69 | 4.8 ± 0.61 |
|                 | +730     |          | 0.5 ± 0.04 | 3.1 ± 1.0  | 3.6 ± 0.42 |
|                 | +6,437   |          | 0.6 ± 0.29 | 3.8 ± 0.52 | 4.1 ± 0.31 |
|                 | +12,587  |          |            | 4.6 ± 0.21 | 4.5 ± 0.79 |
| <i>ATP11a</i>   | -10,661  |          |            | 4.1 ± 0.02 | 3.8 ± 0.49 |
|                 | -7,700   |          |            | 2.7 ± 0.06 | 2.5 ± 0.26 |
|                 | -1,150   |          |            | 1.5 ± 0.29 | 1.6 ± 0.25 |
|                 | -529     |          |            | 0.3 ± 0.03 | 0.4 ± 0.06 |
|                 | +598     | -107,276 |            | 0.3 ± 0.04 | 0.4 ± 0.03 |
|                 | +11,093  | -96,781  |            | 0.3 ± 0.01 | 0.3 ± 0.01 |
|                 | +19,802  | -88,072  |            | 0.6 ± 0.07 | 0.5 ± 0.04 |
|                 | +22,554  | -85,320  |            | 0.5 ± 0.1  | 0.6 ± 0.08 |
|                 | +40,661  | -67,213  |            | 0.4 ± 0.04 | 0.4 ± 0.05 |
|                 | +52,371  | -55,503  |            | 0.4 ± 0.01 | 0.5 ± 0.01 |
|                 | +65,228  | -42,646  |            | 0.4 ± 0.08 | 0.4 ± 0.07 |
|                 | +77,423  | -30,451  |            | 0.7 ± 0.16 | 0.8 ± 0.12 |
|                 | +89,380  | -18,494  |            | 1.1 ± 0.25 | 1.2 ± 0.26 |
|                 | +100,664 | -7,210   |            | 0.5 ± 0.09 | 0.5 ± 0.09 |
|                 | +110,661 | +2,768   |            | 0.6 ± 0.11 | 0.8 ± 0.17 |
| <i>Sucnr1</i>   | -4,981   |          |            | 1.7 ± 0.21 | 1.7 ± 0.44 |
|                 | -891     |          |            | 1.7 ± 0.05 | 1.6 ± 0.2  |
|                 | +109     | -5,582   |            | 1.5 ± 0.02 | 1.5 ± 0.13 |
|                 | +2,615   | -3,076   |            | 1 ± 0.01   | 1 ± 0.11   |
|                 | +5,543   | -148     |            | 2 ± 0.08   | 2.0 ± 0.58 |
| <i>GTPbp4</i>   | -4,919   |          |            | 1.1 ± 0.09 | 1.9 ± 0.7  |
|                 | -830     |          |            | 0.2 ± 0.0  | 0.3 ± 0.08 |
|                 | +3,655   | -19,888  |            | 0.3 ± 0.0  | 0.2 ± 0.04 |
|                 | +8,950   | -14,593  |            | 0.1 ± 0.01 | 0.1 ± 0.03 |
|                 | +16,398  | -7,145   |            | 0.1 ± 0.01 | 0.1 ± 0.03 |
|                 | +22,616  | -927     |            | 0.2 ± 0.01 | 0.1 ± 0.01 |

<sup>1</sup>Ratio of the concentration in the macroH2A1-enriched Thiopropyl Sepharose eluted fraction divided by the concentration in the starting material of adult liver as determined by real-time PCR.

<sup>2</sup>3-Day liver, mixed sexes.

Table 3, supplement. Primer sequences

| Primer Name        | Location  | Forward Primer             | Reverse Primer              | PRODUCT Annealing |                   |
|--------------------|-----------|----------------------------|-----------------------------|-------------------|-------------------|
|                    |           |                            |                             | SIZE              | Temp              |
| <b>LPL</b>         |           |                            |                             |                   |                   |
| LPL LTR#4          | (-)13,626 | TCTCACTATATGAGTGGACAGATCG  | TGGAGTTGCTCCAGTTGTGG        | 73 bp             | 64 <sup>0</sup> c |
| LPL LTR #5         | (-)11,280 | ATGCTCCTGCTTCTCTCAGC       | CAGGAGGGTGTGTAGCTTGC        | 63 bp             | 60 <sup>0</sup> c |
| LPL#38             | (-)6,826  | TAGGATGGCAAGTTGACAGG       | AGCATGAGGATGCTCTGTAGG       | 86 bp             | 64 <sup>0</sup> c |
| LPL#37             | (-)4,147  | GGCTGCATCCTCTCTATCTGG      | CACTGTTAACCAAGACTGTGTGG     | 66 bp             | 60 <sup>0</sup> c |
| LPL#30             | (-)1,260  | GTTGGAGCCAGTAATGAACG       | GTCTCGCCATCTCATCTTGC        | 69 bp             | 60 <sup>0</sup> c |
| LPL #44            | (-)450    | TGCCAAGATACAAAGCAGACC      | GGGACCTTAGGACACATATTGC      | 63 bp             | 64 <sup>0</sup> c |
| LPL #7             | (-)294    | TGTGTGTGAGTGTGAAAGTGTTAGG  | GTTTTCTAAGGGGAAGAAGTTTTGC   | 66 bp             | 60 <sup>0</sup> c |
| LPL #10            | (-)188    | ATCAGTGTAACCCCTCCTCTCTGC   | TGTTTACTAGCTCCAGTTTGCCTACCG | 83 bp             | 60 <sup>0</sup> c |
| LPL #8             | (+)72     | AGACTCTCGATTTCTCCTCCTACTCC | GGGAGGGCAGAACAGTTACAAGG     | 68 bp             | 60 <sup>0</sup> c |
| LPL #42            | (+)3,225  | CAGCACAGTTGGATGAATGC       | AGGTGAGCTTGACTAATCTGAGG     | 84 bp             | 64 <sup>0</sup> c |
| LPL #45            | (+)7,038  | TGTCATCTCATTCCCTGGATTAGC   | GATCACCACGAAGGTCTTGC        | 78 bp             | 60 <sup>0</sup> c |
| LPL #21            | (+)13,129 | GATGAGCAGGATGAGTTACTGG     | ATGAGAGTTCTAGCTTAGATTGTGG   | 67 bp             | 60 <sup>0</sup> c |
| LPL #4             | (+)17,719 | AGGCTTCTGTCTGGACTTCCT      | CAAGGCAGTGTGTAGGTCA         | 86 bp             | 60 <sup>0</sup> c |
| LPL #43            | (+)23,905 | TCTATAATCTGCACCACACAAGC    | CAGCACTGTCAGGAGGAAGC        | 61 bp             | 64 <sup>0</sup> c |
| LPL #34            | (+)25,948 | GCTGGAATGTTAGCCCTTGC       | GAAATCGGTCACCTTTGTCC        | 72 bp             | 60 <sup>0</sup> c |
| <b>Keratin1-23</b> |           |                            |                             |                   |                   |
| Krt1-23 #11        | (-)2,893  | AGAGCCCATGGAGTTCAAGC       | AGGCAAGACAACCCTCACC         | 60 bp             | 64 <sup>0</sup> c |
| Krt1-23 #10        | (-)1,857  | AAACTCCTGGACCCTGTGG        | GGGCCACTTGGTATCTCTGC        | 61 bp             | 64 <sup>0</sup> c |
| Krt1-23 #7         | (-)845    | ACTCTCAACCTCTGCCTTGG       | GTGGTCTGACATGTGTGATGC       | 55 bp             | 64 <sup>0</sup> c |
| Krt1-23 #12        | (-)496    | ACGGCAGCAGACACAAAGG        | GCGGAAGGAAAACAGAGAGG        | 55 bp             | 64 <sup>0</sup> c |
| Krt1-23 #13        | (-)109    | CGTGGTTCTAAACAACAACAGC     | TGTTTCTCTTGGTCAATCC         | 69 bp             | 64 <sup>0</sup> c |
| Krt1-23 #14        | (+)63     | GCGTCAGAGAGCTGAGATAGC      | CTGTGGCTGGAGTTCATGG         | 62 bp             | 64 <sup>0</sup> c |

|            |           |                        |                         |       |                   |
|------------|-----------|------------------------|-------------------------|-------|-------------------|
| Krt1-23 #3 | (+)579    | GAACCAGACTGTGTGCATGG   | TGGGTGAGCAGTACTTGAGC    | 72 bp | 64 <sup>0</sup> c |
| Krt1-23 #2 | (+)2,011  | TGCGTGATACCAACTCAATAGC | TCCATGGGACTAAGACATGC    | 60 bp | 64 <sup>0</sup> c |
| Krt1-23 #4 | (+)4,496  | TGTGAGTCCCTTGCTCTGATCC | TCGTTGGAGGTGTTTGAGC     | 65 bp | 64 <sup>0</sup> c |
| Krt1-23 #5 | (+)9,468  | GCCTTCCATGACCTTGTCC    | AGACAATGAGAGAAGTCCAAAGG | 64 bp | 64 <sup>0</sup> c |
| Krt1-23 #9 | (+)11,673 | CATTGCTCATCTTGCATTCCG  | GTGGTCTGATGGAGTGATGC    | 80 bp | 64 <sup>0</sup> c |
| Krt1-23 #6 | (+)14,853 | ACCAGTGACCTCTCCGATGG   | TGAGTGATGGCCTTGATCG     | 66 bp | 64 <sup>0</sup> c |

**Serpina7**

|             |          |                          |                          |       |                   |
|-------------|----------|--------------------------|--------------------------|-------|-------------------|
| Serpina7#11 | (-)4,505 | AAAGACCCAGGACTTACAAACC   | AAGCAAAGTAGCTTCCTTCTGG   | 60 bp | 64 <sup>0</sup> c |
| Serpina7#10 | (-)2,163 | AGCCCAGATAGTTCCCTACTCC   | TGATTTCCCACATGGCTACC     | 78 bp | 64 <sup>0</sup> c |
| Serpina7#15 | (-)1,739 | CCCAAGTCTCTTGTCTGTAAACC  | AGTTCTTCCGTGTCAGTGTTAGGC | 67 bp | 64 <sup>0</sup> c |
| Serpina7#14 | (-)1,260 | TGACCTAAGAGTGGACGAAGG    | AGCTCCTAGCAGGACAGAGG     | 63 bp | 64 <sup>0</sup> c |
| Serpina7#13 | (-)948   | CCAAAGGAGGCTGAAGTCC      | TCCTTACTCATCTACCCAGTTGC  | 55 bp | 64 <sup>0</sup> c |
| Serpina7#6  | (-)342   | AATAGAGGGAGTGCTTGGTTCTGC | AAAGGCAGTTTATGAGTGTGACG  | 55 bp | 64 <sup>0</sup> c |
| Serpina7#12 | (-)136   | CATGTCACTGGTCTTTAGTGAGG  | GGTGTGTTTCAGCAAGAAATAAGG | 61 bp | 64 <sup>0</sup> c |
| Serpina7#4  | (+)238   | GTATCGGAGGCTCTCTGTGG     | AAGCAACAGATATGCTCACAGG   | 71 bp | 64 <sup>0</sup> c |
| Serpina7#3  | (+)937   | AAACCTGTGCTTGGGAAGTC     | GCAGTGTATCCAAATGTACACAGG | 82 bp | 64 <sup>0</sup> c |
| Serpina7#8  | (+)2,252 | CTGTCCCTTGCTCAATAACATGG  | GGGCTACAACACACAGTGTCC    | 71 bp | 64 <sup>0</sup> c |
| Serpina7#5  | (+)3,300 | TGCTACACATTGGTGAAGAGG    | TTCTTGCTGATCCAGAGACC     | 71 bp | 64 <sup>0</sup> c |

**Scd2**

|         |           |                        |                       |       |                   |
|---------|-----------|------------------------|-----------------------|-------|-------------------|
| Scd2#6  | (-)6,284  | GAAGGAACCTGCACACTGC    | TAGTTGTGCGATGGTGAAGC  | 60 bp | 64 <sup>0</sup> c |
| Scd2#9  | (-)4,653  | TTGGGATATGTGGTCTAACAGG | CGGGAACAATTCAAGTGTGG  | 63 bp | 64 <sup>0</sup> c |
| Scd2#8  | (-)2,145  | GGCTTAAGAAACATCACCAACC | GCCCTTACATTCCCTCAACC  | 73 bp | 64 <sup>0</sup> c |
| Scd2#7  | (-)1285   | TTCAGCATTCTTGGCTATGG   | CAACTCTCTGGCTTGTGACC  | 71 bp | 64 <sup>0</sup> c |
| Scd2 #4 | (-)370    | GCTCTCTGTTGGTGGTAGCC   | GACCACTTGCAACTCCATCC  | 77 bp | 64 <sup>0</sup> c |
| Scd2#2  | (+)730    | CTGCACATTTCCGTGTTCC    | GATGCAATAACGGCCATAACC | 76 bp | 64 <sup>0</sup> c |
| Scd2 #5 | (+)6,437  | AGCAGCCGAATCACTAAAGG   | CACCTAACTTGTGCCCTTCC  | 80 bp | 64 <sup>0</sup> c |
| Scd2#3  | (+)12,587 | GCCTATGTCCCAGATGACG    | CTGACGCATCCATTCAACC   | 62 bp | 64 <sup>0</sup> c |

**ATP11a**

|            |           |                       |                       |       |                   |
|------------|-----------|-----------------------|-----------------------|-------|-------------------|
| ATP11a #2  | (-)10,661 | GCTGTGCTGGTCGTTATGC   | GCATGTGAAGCTCCTGTGC   | 81 bp | 64 <sup>0</sup> c |
| ATP11a #3  | (-)7,700  | AGCACTTGCCCTCAACAAGG  | CCTACCCAAGCAATCTCACC  | 69 bp | 64 <sup>0</sup> c |
| ATP11a #12 | (-)1,150  | CACAGCAAGTCCAGGAAGC   | GAGCACCAGCTACAGACACC  | 73 bp | 64 <sup>0</sup> c |
| ATP11a#18  | (-)529    | ACGTGTTTGGTTTGGTCTCC  | GATCCTCAGGTGGCTACAGG  | 78 bp | 64 <sup>0</sup> c |
| ATP11a #4  | (+)598    | GACAGCTTGTCTTCCCTAAGC | GCTCCTCAAACCTGTGACC   | 79 bp | 64 <sup>0</sup> c |
| ATP11a #7  | (+)11,093 | CTGTGTAGGCTTCCGGTCTCC | GGCAGGAGGAAGGTACATGG  | 58 bp | 64 <sup>0</sup> c |
| ATP11a #6  | (+)19,802 | AGGTGGCTTGTCTTGGGAAGC | AAGTCTAAGGCCGAGCACAGC | 58 bp | 64 <sup>0</sup> c |

|            |     |         |                       |                        |       |                   |
|------------|-----|---------|-----------------------|------------------------|-------|-------------------|
| ATP11a #13 | (+) | 22,554  | CAGCCTTGGAGCAGATAACC  | CCTTGAAGGCAGTGTCTTGG   | 88 bp | 64 <sup>0</sup> c |
| ATP11a #8  | (+) | 40,661  | TTGTACCACCATTGGTCTCC  | GTGGCATGTCACCTGAGTTGG  | 78 bp | 64 <sup>0</sup> c |
| ATP11a#10  | (+) | 52,371  | TGGGACTTCTGTGATCTGTCC | CTGGGTATGCCAATCTCTGG   | 59 bp | 64 <sup>0</sup> c |
| ATP11a #11 | (+) | 65,228  | CCACCAGAGGAACAATAGCC  | CATGCACATCCTGTGAGTCC   | 83 bp | 64 <sup>0</sup> c |
| ATP11a #15 | (+) | 77,423  | CACGTACCTGAGGCTGAAGG  | CATGCAGACAGCTTCTCACC   | 82 bp | 64 <sup>0</sup> c |
| ATP11a #16 | (+) | 89,380  | AAGCCTGAGTGAGGCGTAGC  | CACACAACAGCTCCAACCTGC  | 72 bp | 64 <sup>0</sup> c |
| ATP11a #17 | (+) | 100,664 | CACTGGACACGCACTACTGG  | GGAGAAGGCAATGTAGAAGAGC | 77 bp | 64 <sup>0</sup> c |
| ATP11a #14 | (+) | 110,661 | TCCATTCCCTGAGCACAAGC  | CTTTGGGTGTGCCATTCC     | 58 bp | 64 <sup>0</sup> c |

**Succinate Receptor**

|           |     |       |                         |                        |       |                   |
|-----------|-----|-------|-------------------------|------------------------|-------|-------------------|
| Sucnr1 #5 | (-) | 4,981 | CAGTCCCAAATCCAGACACC    | AATCCAGGACATTGCTGTGG   | 74 bp | 64 <sup>0</sup> c |
| Sucnr1 #4 | (-) | 891   | GGTGGTGGTCAGAACTTTCC    | GTCATGGACCTCTCCAAGG    | 85 bp | 64 <sup>0</sup> c |
| Sucnr1 #1 | (+) | 109   | CCGACAGCAGAATGGTAAGG    | TTGGTCTTCTTTGGTGTGACC  | 63 bp | 64 <sup>0</sup> c |
| sucnr1 #6 | (+) | 2,615 | AACAGACCCAGAGCAGTTGG    | AATATCCACACTTAGCCCTTGC | 55 bp | 64 <sup>0</sup> c |
| Sucnr1 #3 | (+) | 5,543 | AGCTAGTTGCAAATGCTGAATGC | AACACGCTTATCGACCTGACC  | 55 bp | 64 <sup>0</sup> c |

**GTPbp4**

|            |     |        |                       |                       |       |                   |
|------------|-----|--------|-----------------------|-----------------------|-------|-------------------|
| GTPbp4 #1  | (-) | 4,919  | GGTTTGGCGATATTTGTGG   | CCAATCAACTCTTTCCATGC  | 59 bp | 64 <sup>0</sup> c |
| GTPbp4b #2 | (-) | 830    | TGGCAACACCTGAGAAAGG   | AAGCCACCCATTTCTTTACC  | 85 bp | 64 <sup>0</sup> c |
| GTPbp4b #3 | (+) | 3,655  | GGCTTGACAGGGTCTTTGG   | CAAACCTGCAGCTCTGATCC  | 57 bp | 64 <sup>0</sup> c |
| GTPbp4b #4 | (+) | 8,950  | TGTAGAAACGCTGGGTTTGG  | GAAGCACATTTCCCAACAGG  | 56 bp | 64 <sup>0</sup> c |
| GTPbp4b #5 | (+) | 16,398 | GTAGGCAAGAACAGCCTTCC  | TGCTTTGCAACCTCCTTACC  | 81 bp | 64 <sup>0</sup> c |
| GTPbp4b #6 | (+) | 22,616 | TGGTGGTCTGAGAGAGAGTGG | ACCAAAGCCAGTATGTCAACC | 57 bp | 64 <sup>0</sup> c |

**cdNA Primers**

|                        |                         |                         |        |                   |
|------------------------|-------------------------|-------------------------|--------|-------------------|
| <i>Serpina7#1</i>      | TTGTGGGATAGAATTTGGCTAC  | TTTGTGTCACCAGAACATCCTC  | 163 bp | 60 <sup>0</sup> c |
| <i>Serpina7#2</i>      | AAGGCTGTGCTACACATTGG    | CGGATAACAGGGTGAAGAGG    | 104 bp | 64 <sup>0</sup> c |
| <i>Lpl</i>             | GAGCGAGAACATTCCCTTCA    | TCTGAGTCTCTCCGGCTTTC    | 203 bp | 55 <sup>0</sup> c |
| <i>Krt1-23</i>         | TCGATACTCCTGCCGTCTCC    | TGACTCAGATCCATCCATCG    | 205 bp | 60 <sup>0</sup> c |
| <i>ATP11a</i>          | GGCATATCTGCACTGACTGG    | ATTGCATTCACCAAGTGACG    | 167 bp | 64 <sup>0</sup> c |
| <i>CD36</i>            | GCAAAGTTGCCATAATTGAGTCC | GTCTGTGCCATTAATCATGTCCG | 86 bp  | 60 <sup>0</sup> c |
| <i>Scd2</i>            | TGGGATAATATTCCTGACCTACC | ACGTCATCTGGGACATAGGC    | 163 bp | 64 <sup>0</sup> c |
| <i>Thrsp</i>           | GAGTGCATCTGTGGACTTGG    | GAGTAACTGCGACATGACACC   | 198 bp | 60 <sup>0</sup> c |
| <i>GTPbp4</i>          | AATGATGGAAATCCGACAGC    | TGTCCACACCAAGACTACGC    | 164 bp | 60 <sup>0</sup> c |
| <i>Succinate recep</i> | GGTCCACATGAATCAGAAGG    | ACACGCTTATCGACCTGACC    | 261 bp | 60 <sup>0</sup> c |
| <i>Androgen recep</i>  | CTGCTCAGTAGAGTGAATGTTGC | GCCTTCTCCATGGTTCTCC     | 196 bp | 60 <sup>0</sup> c |

Figure 1, supplement

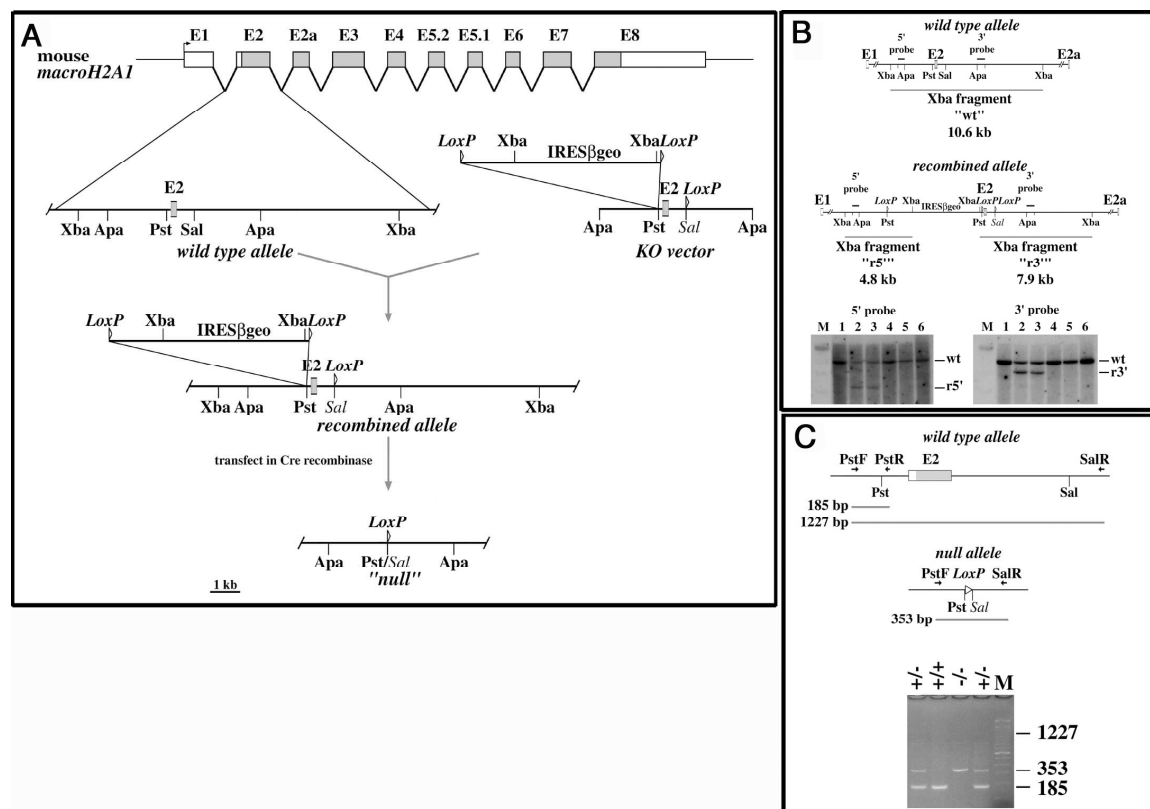

Fig. 1, supplement. Strategy used for making a *macroH2A1* knockout and identifying recombined and knockout alleles. **(A)** Diagram of exon structure of *macroH2A1* is at top; exon 5.2 is used in macroH2A1.2 and exon 5.1 in macroH2A1.1. Below on the left is a map of the wild type allele around exon 2 (E2) and on the right is a diagram of our KO vector; the cloning vector is not shown. The bottom half shows a map of the recombined allele before and after Cre mediated recombination between *loxP* sites. **(B)** Southern blots with 5' and 3' probes showing homologous recombination in 2 ES cell clones, lanes 2 and 3. **(C)** PCR genotype assay. PCRs with 1 forward primer, PstF, and 2 reverse primers, PstR and SalR, were used. Wild type allele produces a fragment of 185 bp (the 1227 bp fragment is usually not seen) while null allele produces a fragment of 353 bp.
